# Supplementary material for: GmFAD3A, A ω-3 Fatty Acid Desaturase Gene, Enhances Cold Tolerance and Seed Germination Rate under Low Temperature in Rice
Source: PubMed Central journal article supplement (PMC6696117; doi:10.3390/ijms20153796), 2019-08-03
Supplement: ijms-20-03796-s001.pdf [file ijms-20-03796-s001.pdf]

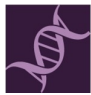

Supplementary Materials:

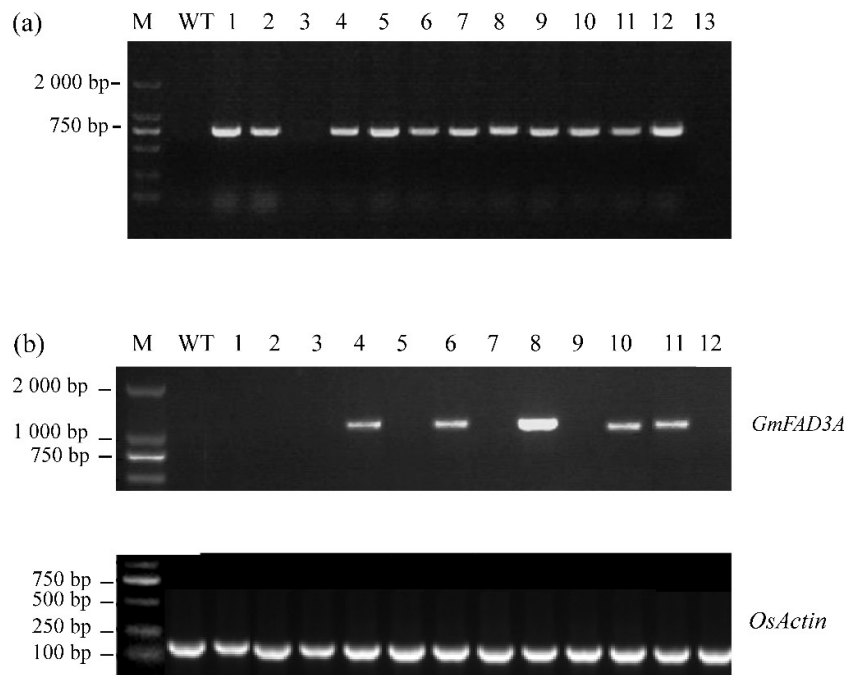

**Figure S1. Analysis of T<sub>0</sub> transgenic rice.** a, *Hpt* PCR detection of T<sub>0</sub> transgenic rice. b, The *GmFAD3A* expression in transgenic plants was determined by RT-PCR analysis.

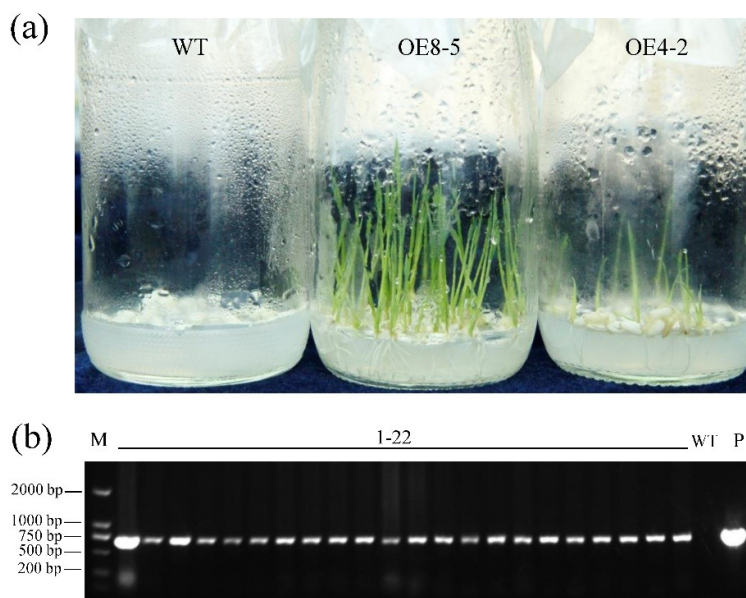

**Figure S2. Screening of homozygous plants.** A, The hygromycin-resistant plants were selected to further plant. B, *Hpt* PCR detection of OE8-5 transgenic rice.

**Table S1.** Primers for *GmFAD3A* functional analysis.

| Purpose             | Name      | Sequence (5'→3')               |
|---------------------|-----------|--------------------------------|
| GmFAD3A cDNA clone  | FAD3-cF   | CGCGGATCCATGGTTAAAGACACAAAGCC  |
|                     | FAD3-cR   | CGCGGATCCGAAACTCAGTCTCGGTGCGAG |
| Transgenic analysis | HptF      | CTGAACTCACCGCGACGTCTGTC        |
|                     | HptR      | TAGCGCGTCTGCTGCTCCATACA        |
| qRT-PCR analysis    | OsACT1-qF | TCTCTCTGTATGCCAGTGGTCGT        |
|                     | OsACT1-qR | TCATAGTCCAGGGCGATGTAGG         |
|                     | GmFAD3-qF | GCAATCTGTTCCCACCCAGT           |
|                     | GmFAD3-qR | TCCATTCCCTTGCCGCGATAC          |

**Table S2.** Analysis of yield parameters of WT and *GmFAD3A* OE lines.

| Plants                | WT         | OE4-2      | OE8-5       |
|-----------------------|------------|------------|-------------|
| Total spikelets       | 117.1±1.42 | 109.3±2.33 | 116.3±2.36  |
| 1000-grain weight (g) | 25.40±1.16 | 24.20±1.01 | 23.63±0.67* |
| Seed setting (%)      | 89.38±2.11 | 86.99±4.21 | 87.54±4.85  |
| Grain length (mm)     | 7.88±0.21  | 7.52±0.13  | 7.72±0.34   |
| Grain width (mm)      | 3.40±0.06  | 3.43±0.12  | 3.25±0.09   |
